# Supplementary material for: The association between MAD2 and prognosis in cancer: a systematic review and meta-analyses
Source: PubMed Central journal article supplement (PMC5731948; doi:10.18632/oncotarget.18414), 2017-06-08
Supplement: oncotarget-08-102223-s001.pdf [file oncotarget-08-102223-s001.pdf]

# The association between MAD2 and prognosis in cancer: A systematic review and meta-analyses

## Supplementary Materials

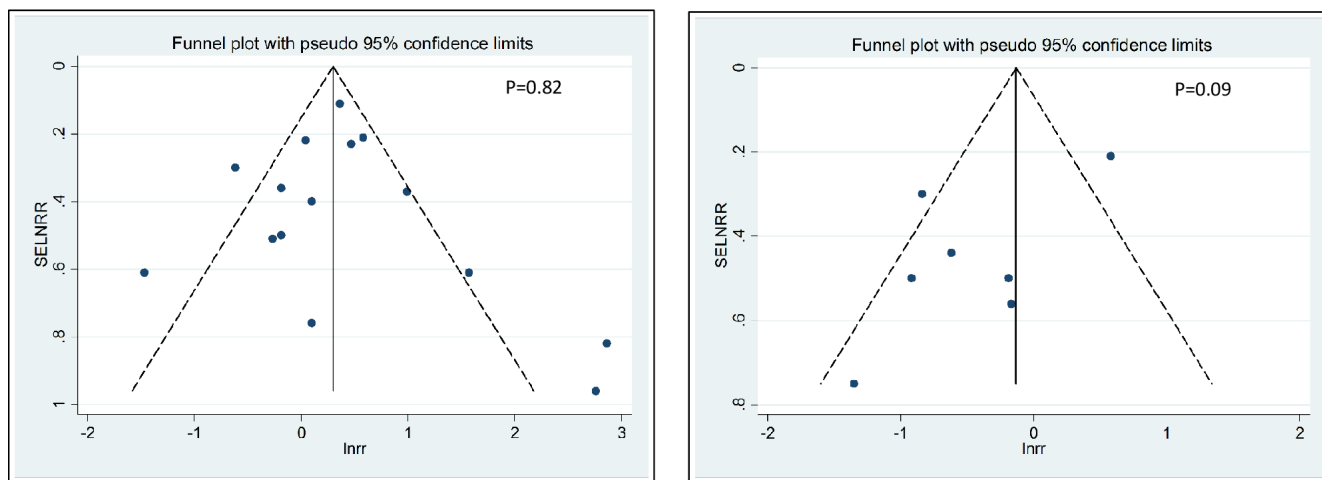

Supplementary Figure 1: Funnel plots of studies investigating MAD2 expression in relation to overall cancer survival (left panel) and progression-free survival (right panel).

**Supplementary Table 1: Percentage of positive MAD2 expression and MAD2 overexpression in numerous carcinoma types**

| Author        | Cancer site(s)           | % positive                                                                                                        | Degree of MAD2 expression                                                                                                                                                                                | Mean staining intensity                                                                                                                                              | Mean weighted score                                                        |
|---------------|--------------------------|-------------------------------------------------------------------------------------------------------------------|----------------------------------------------------------------------------------------------------------------------------------------------------------------------------------------------------------|----------------------------------------------------------------------------------------------------------------------------------------------------------------------|----------------------------------------------------------------------------|
| Agosten       | Breast                   |                                                                                                                   |                                                                                                                                                                                                          | 2.1 for ductal carcinomas, 1.6 for lobular carcinomas.                                                                                                               |                                                                            |
| Burum-Auensen | Colorectal               | 59% (median)                                                                                                      |                                                                                                                                                                                                          |                                                                                                                                                                      |                                                                            |
| Burum-Auensen | Colorectal (UC-related)  | 32% (mean)                                                                                                        |                                                                                                                                                                                                          |                                                                                                                                                                      |                                                                            |
| Burum-Auensen | Testicular               | 15% intratubular germ cell neoplasia, 27% seminomas, 58% embryonal carcinomas, 52% yolk sac tumors, 30% teratomas |                                                                                                                                                                                                          |                                                                                                                                                                      |                                                                            |
| Choi          | Bladder                  | 51%                                                                                                               |                                                                                                                                                                                                          |                                                                                                                                                                      |                                                                            |
| Du            | Breast                   | 49%                                                                                                               |                                                                                                                                                                                                          |                                                                                                                                                                      |                                                                            |
| Fung          | Testicular               |                                                                                                                   |                                                                                                                                                                                                          | Mean nuclear intensity was lower ( $p < 0.0001$ ) while mean cytoplasmic MAD2 staining intensity was higher ( $p < 0.0001$ ) in seminoma tissues than normal tissues |                                                                            |
| Genga         | Myelodysplastic syndrome | 87.5%                                                                                                             | Higher MAD2 in MDS v. controls ( $28.3 \pm 21.7\%$ v. $5.96 \pm 2.7\%$ , respectively, $p < 0.001$ )                                                                                                     |                                                                                                                                                                      |                                                                            |
| Gladhaug      | Pancreatic               | 69.5% pancreatobiliary 77.9% Intestinal                                                                           |                                                                                                                                                                                                          |                                                                                                                                                                      |                                                                            |
| Hannisdal     | Tonsillar                | 27% (median)                                                                                                      |                                                                                                                                                                                                          |                                                                                                                                                                      |                                                                            |
| Hisaoka       | Sarcoma                  | 52% TA, 66% non-TA                                                                                                |                                                                                                                                                                                                          |                                                                                                                                                                      |                                                                            |
| Kato          | Lung (2012)              |                                                                                                                   | Low/high expression in 80.7%/19.3% of adenocarcinoma Low/high expression in 55.6%/44.4% of squamous cell carcinoma                                                                                       |                                                                                                                                                                      |                                                                            |
| Kato          | Lung (2011)              | 42.7%                                                                                                             | Low/high expression in 73.7%/26.3% of squamous cell carcinoma                                                                                                                                            |                                                                                                                                                                      |                                                                            |
| Kim           | Uterine cervical         |                                                                                                                   | Overexpression in 52.4% squamous cell carcinomas                                                                                                                                                         |                                                                                                                                                                      |                                                                            |
| Ko            | Salivary duct            |                                                                                                                   | High expression in 55.6%                                                                                                                                                                                 |                                                                                                                                                                      |                                                                            |
| Li            | Endometrial              | 85.71%                                                                                                            |                                                                                                                                                                                                          |                                                                                                                                                                      |                                                                            |
| Li            | Colorectal (2003)        | 86.8%                                                                                                             | Cancer/ normal ratio of MAD2 expression = $2.07 \pm 1.87$                                                                                                                                                |                                                                                                                                                                      |                                                                            |
| Li            | Colorectal (2004)        | 75%                                                                                                               |                                                                                                                                                                                                          |                                                                                                                                                                      |                                                                            |
| Liao          | Cervical                 | CIN = 64.62%, CIN I = 100%, CIN II = 60.87%, CIN III = 48.15%, CC = 32%, SCC = 22.67%, AC = 40%                   | Staining intensity-barely detectable, easily observed, strong: CIN = 26.2/32.3/6.2%, CIN I = 46.7/40/13.3%, CIN II = 8.7/43.5/8.7%, CIN III = 29.6/18.5/0%, CC = 28/49/0%, SCC = 20/6.7/0%, AC = 40/0/0% |                                                                                                                                                                      |                                                                            |
| McGrogan      | Ovarian                  | 93% (total), 34% (cytoplasmic)                                                                                    | Nuclear expression: 13% weak, 44% moderate, 36% strong                                                                                                                                                   |                                                                                                                                                                      |                                                                            |
| Morishta      | Uterine cervical         |                                                                                                                   | NAC+OP+R group: low/medium/high expression in 33.3/48.4/18.2% of cases. NAC+R group: low/medium/high expression in 10/30/60% of cases                                                                    |                                                                                                                                                                      | NAC+OP+R group: 4.5, NAC+R group: 8.2, CR+PR group: 4.9, SD +PD group: 4.3 |
| Nakano        | Ovarian serous           |                                                                                                                   |                                                                                                                                                                                                          |                                                                                                                                                                      | Relapsed: 4.3, Relapse-free group: 7.2                                     |
| Nakano        | Ovarian mucinous         |                                                                                                                   |                                                                                                                                                                                                          |                                                                                                                                                                      | Borderline malignant: 4.3, Malignant: 7.6                                  |
| Park          | Ovarian                  |                                                                                                                   | Low /high expression in 47.1/52.9% of cases                                                                                                                                                              |                                                                                                                                                                      |                                                                            |
| Rizzardi      | Oral SCC                 | 100%                                                                                                              | Overexpressed in 36.7% of cases                                                                                                                                                                          |                                                                                                                                                                      |                                                                            |
| Sotillo       | Various                  |                                                                                                                   | 55.3% diffuse large B-cell lymphoma presented strong or moderate levels. MAD2 upregulation also seen in a subset of grade 3 follicular lymphomas, Burkitt's lymphomas and T-cell lymphoblastic lymphomas |                                                                                                                                                                      |                                                                            |
| Suraokar      | Mesothelioma             |                                                                                                                   | Higher expression in cytoplasm of epitheloid tumours compared to the two other malignant pleural mesothelioma histotypes                                                                                 |                                                                                                                                                                      |                                                                            |
| Teixeira      | Oral cancer              | 100%                                                                                                              | Mean labelling index of $64.90 \pm 18.70$ . in 61.1% tumour lesions. 42.6/33.3/24.1% of cases had strong/moderate/weak staining. moderate and 24.1% weak staining                                        |                                                                                                                                                                      |                                                                            |
| Thoma         | Renal and various        |                                                                                                                   | pVHL-negative ccRCC samples showed low MAD2 expression whereas high MAD2 expression was detected in ccRCC samples with strong pVHL expression                                                            |                                                                                                                                                                      |                                                                            |
| Uemra         | Esophageal SCC           |                                                                                                                   | Overexpression in 86% of cases                                                                                                                                                                           |                                                                                                                                                                      |                                                                            |
| Wang          | Gastric                  | 71%                                                                                                               | Of MAD2 positive samples, 79% showed expression in the nucleus                                                                                                                                           |                                                                                                                                                                      |                                                                            |
| Yu            | Osteosarcoma             | 100%                                                                                                              | 4.2% had cytoplasmic staining                                                                                                                                                                            |                                                                                                                                                                      |                                                                            |
| Zhao          | Endometrial              | 85.7%                                                                                                             |                                                                                                                                                                                                          |                                                                                                                                                                      |                                                                            |

**Supplementary Table 2: Sensitivity analysis excluding individual studies from meta-analysis for highest v. lowest category of MAD2 protein levels and cancer progression**

|                                           | Pooled risk estimate (95% CI) | I-squared (%) | P-value |
|-------------------------------------------|-------------------------------|---------------|---------|
| Overall survival studies                  |                               |               |         |
| Excluding Burum Auensen <i>et al</i> 2008 | 1.402 (0.992–1.982)           | 73.0%         | 0.056   |
| Excluding Choi <i>et al</i> 2013          | 1.271 (0.905–1.785)           | 72.0%         | 0.166   |
| Excluding Furlong <i>et al</i> 2012       | 1.454 (1.053–2.008)           | 67.7%         | 0.023   |
| Excluding Genga <i>et al</i> 2015         | 1.263 (0.921–1.730)           | 70.1%         | 0.147   |
| Excluding Gladhaug (P) <i>et al</i> 2010  | 1.391 (0.967–2.002)           | 73.2%         | 0.075   |
| Excluding Gladhaug (I) <i>et al</i> 2010  | 1.369 (0.966–1.941)           | 73.9%         | 0.078   |
| Excluding Kato <i>et al</i> 2011          | 1.314 (0.914–1.889)           | 73.0%         | 0.140   |
| Excluding Kim <i>et al</i> 2014           | 1.387 (0.985–1.952)           | 73.6%         | 0.061   |
| Excluding Ko <i>et al</i> 2010            | 1.392 (0.990–1.957)           | 73.4%         | 0.057   |
| Excluding Li <i>et al</i> 2013            | 1.239 (0.913–1.681)           | 67.7%         | 0.170   |
| Excluding Nakano (S) <i>et al</i> 2012    | 1.444 (1.055–1.976)           | 68.9%         | 0.022   |
| Excluding Nakano (M) <i>et al</i> 2012    | 1.356 (0.967–1.903)           | 74.0%         | 0.078   |
| Excluding Suraokar <i>et al</i> 2014      | 1.331 (0.924–1.916)           | 73.7%         | 0.124   |
| Excluding Yu <i>et al</i> 2010            | 1.263 (0.910–1.752)           | 71.5%         | 0.163   |
| Excluding Zhang <i>et al</i> 2008         | 1.365 (0.913–2.043)           | 73.8%         | 0.130   |
| Progression- free survival studies        |                               |               |         |
| Excluding Furlong <i>et al</i> 2012       | 0.715 (0.374–1.365)           | 69.8%         | 0.309   |
| Excluding Kato <i>et al</i> 2011          | 0.506 (0.355–0.721)           | 0%            | 0.000   |
| Excluding Kim <i>et al</i> 2014           | 0.623 (0.314–1.237)           | 78.6%         | 0.176   |
| Excluding Ko <i>et al</i> 2010            | 0.624 (0.317–1.226)           | 78.6%         | 0.171   |
| Excluding McGrogan <i>et al</i> 2014      | 0.669 (0.336–1.335)           | 77.1%         | 0.254   |
| Excluding Nakano <i>et al</i> 2012        | 0.703 (0.367–1.346)           | 76.1%         | 0.287   |
| Excluding Park <i>et al</i> 2013          | 0.719 (0.388–1.332)           | 75.8%         | 0.294   |
